# Supplementary material
Source: PubMed Central journal article supplement (PMC2818537)
Supplement: NIHMS160721-supplement-1_si_001.pdf [file NIHMS160721-supplement-1_si_001.pdf]

# Near Infrared Fluorescent NanoGUMBOS for Biomedical Imaging

David K. Bwambok<sup>1</sup>, Bilal El-Zahab<sup>1</sup>, Santhosh K. Challa<sup>1</sup>, Min Li<sup>1</sup>, Lin Chandler<sup>2</sup>, Gary

A. Baker<sup>3</sup> and Isiah M. Warner\*<sup>1</sup>

<sup>1</sup>Department of Chemistry, Louisiana State University, Baton Rouge, LA, 70803

<sup>2</sup>Horiba Jobin Yvon Inc., Edison, NJ, 08820

<sup>3</sup>Chemical Sciences Division, Oak Ridge National Laboratory, Oak Ridge, TN 37831

## Supporting Information

### Contents:

**Table S1.** Yields, melting points and aqueous solubility of HMT-based GUMBOS and size of corresponding particles.

**Table S2.** Elemental analysis of HMT-based GUMBOS.

**Figure S1-1.** <sup>1</sup>H NMR (CDCl<sub>3</sub>, 400MHz) of [HMT][AOT].

**Figure S1-2a.** <sup>1</sup>H NMR (CDCl<sub>3</sub>, 400MHz) of [HMT][NTf<sub>2</sub>].

**Figure S1-2b.** <sup>19</sup>F NMR (CDCl<sub>3</sub>, 236MHz) of [HMT][NTf<sub>2</sub>].

**Figure S1-3a.** <sup>1</sup>H NMR (CDCl<sub>3</sub>, 400MHz) of [HMT][3, 5-CF<sub>3</sub>PheB].

**Figure S1-3b.** <sup>19</sup>F NMR (CDCl<sub>3</sub>, 236MHz) of [HMT][3, 5-CF<sub>3</sub>PheB].

**Figure S1-4a.** <sup>1</sup>H NMR (CDCl<sub>3</sub>, 400MHz) of [HMT][BF<sub>4</sub>].

**Figure S1-4b.** <sup>19</sup>F NMR (CDCl<sub>3</sub>, 236MHz) of [HMT][BF<sub>4</sub>].

**Figure S2.** UV-Vis-NIR absorption spectra (A) and fluorescence emission spectra (B) of HMT nanoGUMBOS suspension in water. Excitation wavelength at 743 nm. Solid line [HMT][AOT], dashed line [HMT][NTf<sub>2</sub>], and dotted line [HMT][3, 5-CF<sub>3</sub>PheB].

**Figure S3.** Histogram of size of [HMT][AOT] nanoGUMBOS obtained from TEM image shown in Figure 2A. The particles had an average particle diameter of 71 ± 16 nm.

**Figure S4.** Fluorescence emission spectrum of equimolar mixture of [HMT][I] and [Na][AOT] in ethanol (solid gray line), [HMT][AOT] in ethanol (dotted line), and [HMT][AOT] nanoGUMBOS suspension in water (solid black line). The excitation wavelength is 743 nm for all three samples.

**Table S1.** Yields, melting points and aqueous solubility of HMT-based GUMBOS and size of corresponding particles.

| NIR GUMBOS                     | Yields (%) | Anion structure                                                                    | MW of anion (g/mol) | mp (°C) | Particle size (nm) | Solubility in water |
|--------------------------------|------------|------------------------------------------------------------------------------------|---------------------|---------|--------------------|---------------------|
| [HMT][AOT]                     | 93         | 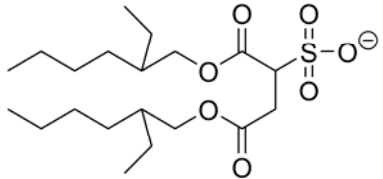  | 421                 | 58      | 71 ± 16            | N                   |
| [HMT][NTf <sub>2</sub> ]       | 94         |   | 283                 | 220     | 60 ± 11            | N                   |
| [HMT][BF <sub>4</sub> ]        | 84         |   | 86                  | 175     | N/A                | Y                   |
| [HMT][3,5CF <sub>3</sub> PheB] | 91         |  | 281                 | 95      | 130 ± 41           | N                   |

**Table S2.** Elemental analysis of HMT-based GUMBOS.

|                                    | <b>C</b>   |           | <b>H</b>   |           | <b>N</b>   |           |
|------------------------------------|------------|-----------|------------|-----------|------------|-----------|
|                                    | Theory (%) | Found (%) | Theory (%) | Found (%) | Theory (%) | Found (%) |
| [HMT][AOT]                         | 70.82      | 69.38     | 8.49       | 8.63      | 3.37       | 3.35      |
| [HMT][NTf <sub>2</sub> ]           | 53.98      | 53.99     | 4.82       | 4.79      | 6.09       | 6.19      |
| [HMT][3,5<br>CF <sub>3</sub> PheB] | 64.31      | 61.97     | 5.21       | 4.92      | 4.05       | 3.61      |
| [HMT][BF <sub>4</sub> ]            | 70.10      | 64.03     | 6.64       | 6.35      | 5.64       | 5.09      |

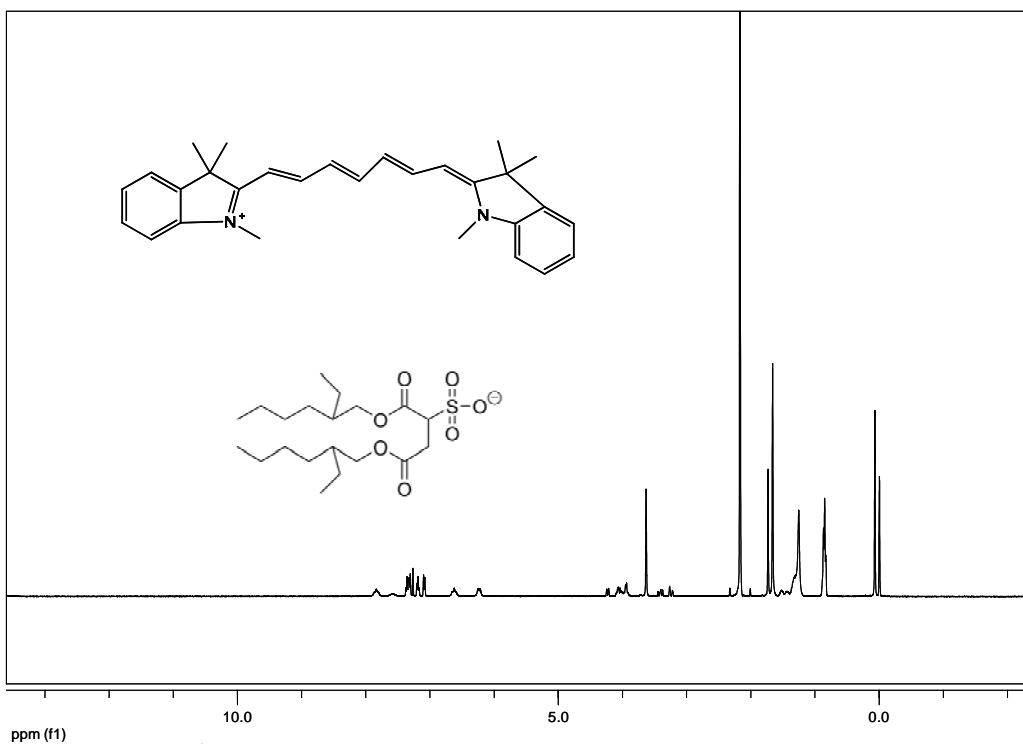

**Figure S1-1.**  $^1\text{H}$  NMR ( $\text{CDCl}_3$ , 400MHz) of [HMT][AOT].

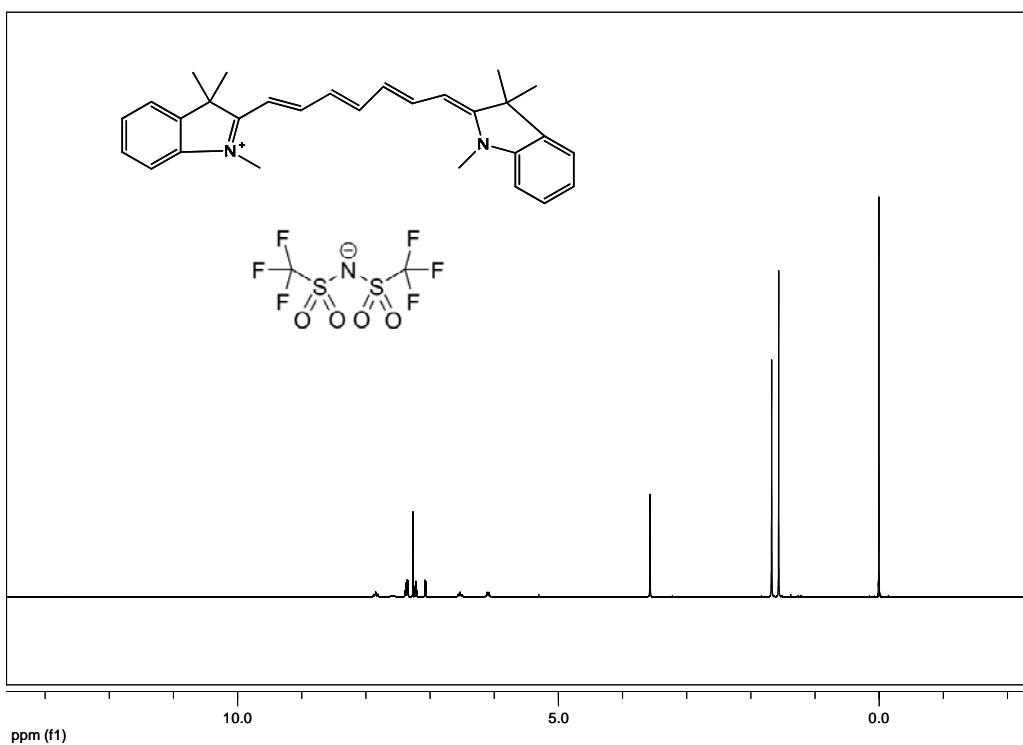

**Figure S1-2a.**  $^1\text{H}$  NMR ( $\text{CDCl}_3$ , 400MHz) of [HMT][NTf<sub>2</sub>].

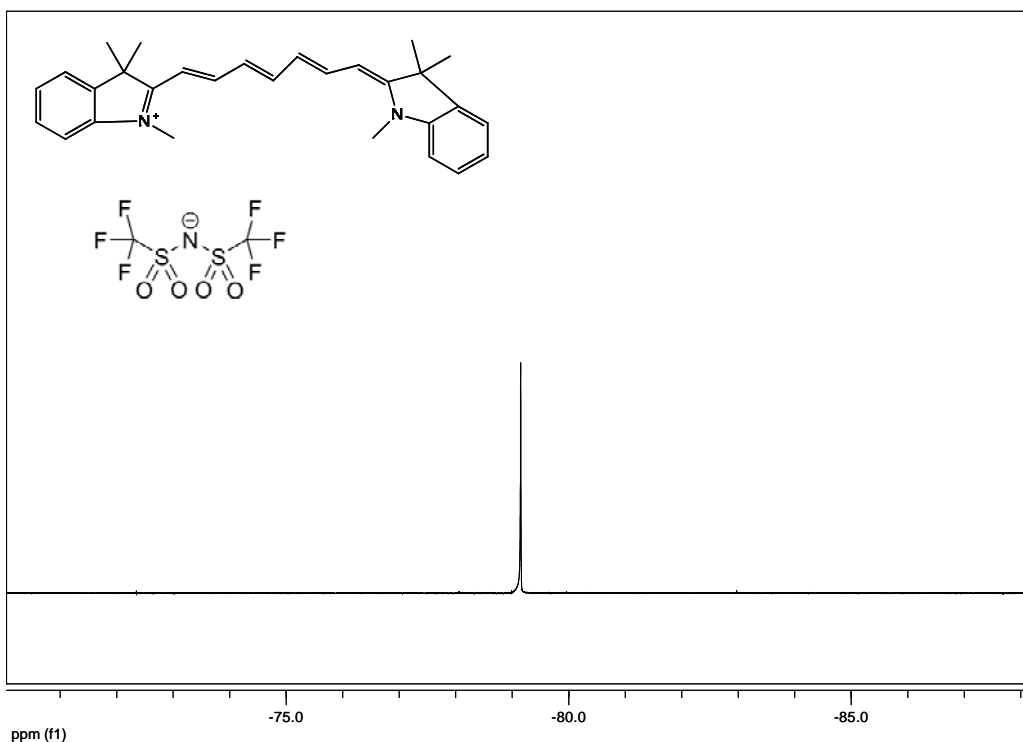

**Figure S1-2b.** <sup>19</sup>F NMR (CDCl<sub>3</sub>, 236MHz) of [HMT][NTf<sub>2</sub>].

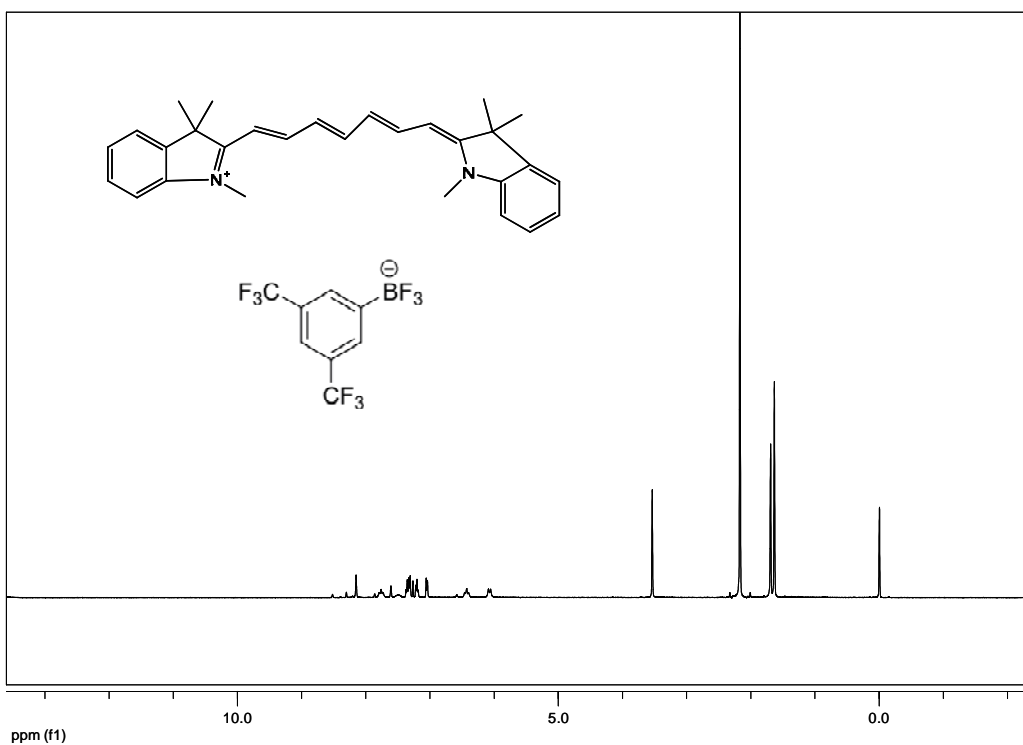

**Figure S1-3a.** <sup>1</sup>H NMR (CDCl<sub>3</sub>, 400MHz) of [HMT][3,5-CF<sub>3</sub>PheB].

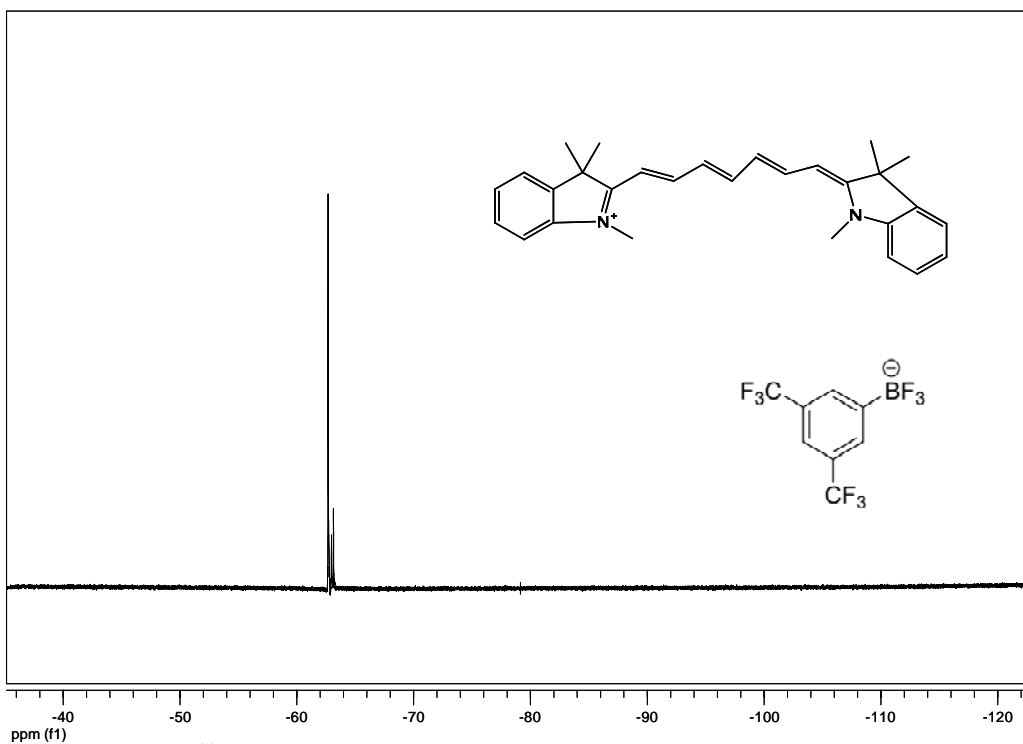

**Figure S1-3b.**  $^{19}\text{F}$  NMR ( $\text{CDCl}_3$ , 236MHz) of  $[\text{HMT}][3,5\text{-CF}_3\text{PheB}]$ .

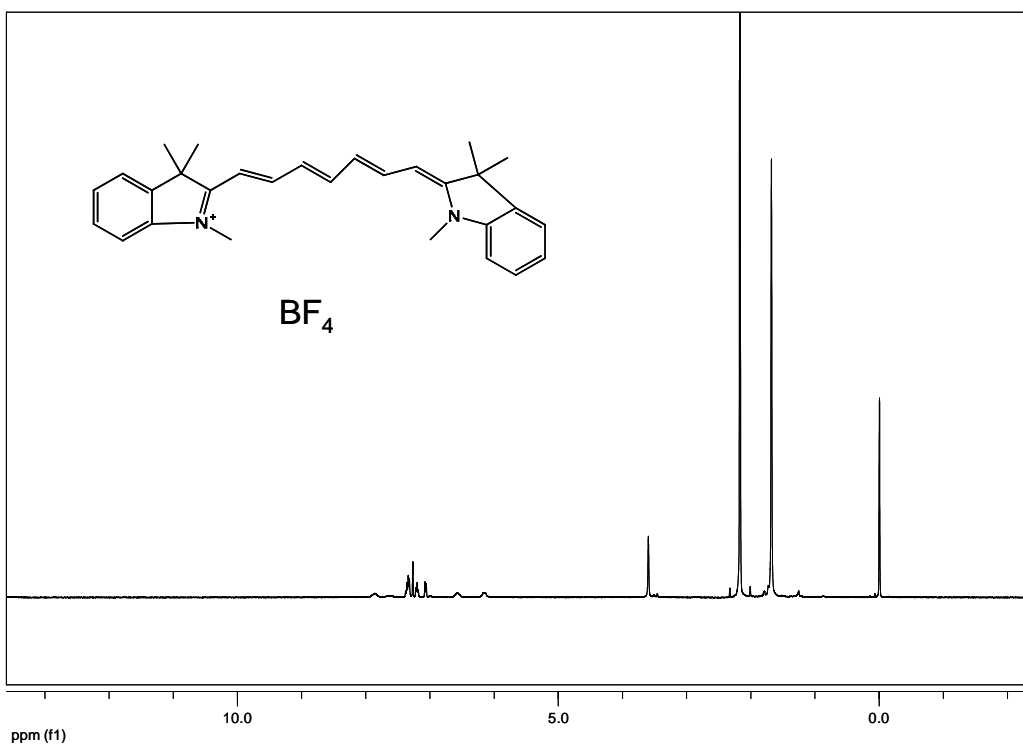

**Figure S1-4a.**  $^1\text{H}$  NMR ( $\text{CDCl}_3$ , 400MHz) of  $[\text{HMT}][\text{BF}_4]$ .

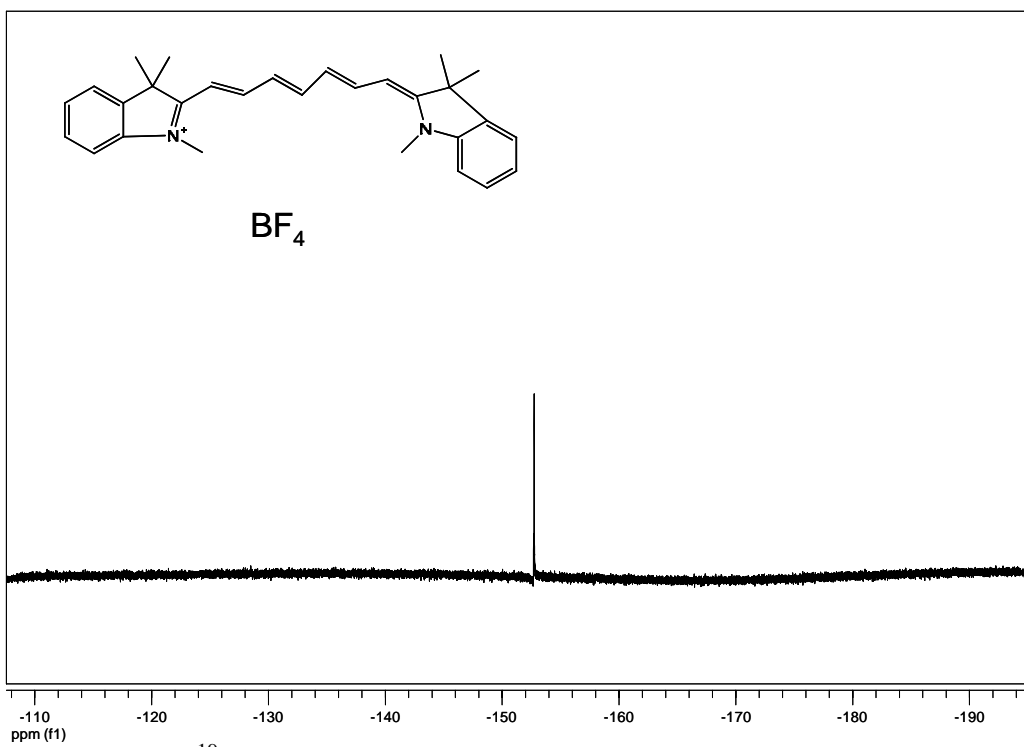

**Figure S1-4b.** <sup>19</sup>F NMR (CDCl<sub>3</sub>, 236MHz) of [HMT][BF<sub>4</sub>].

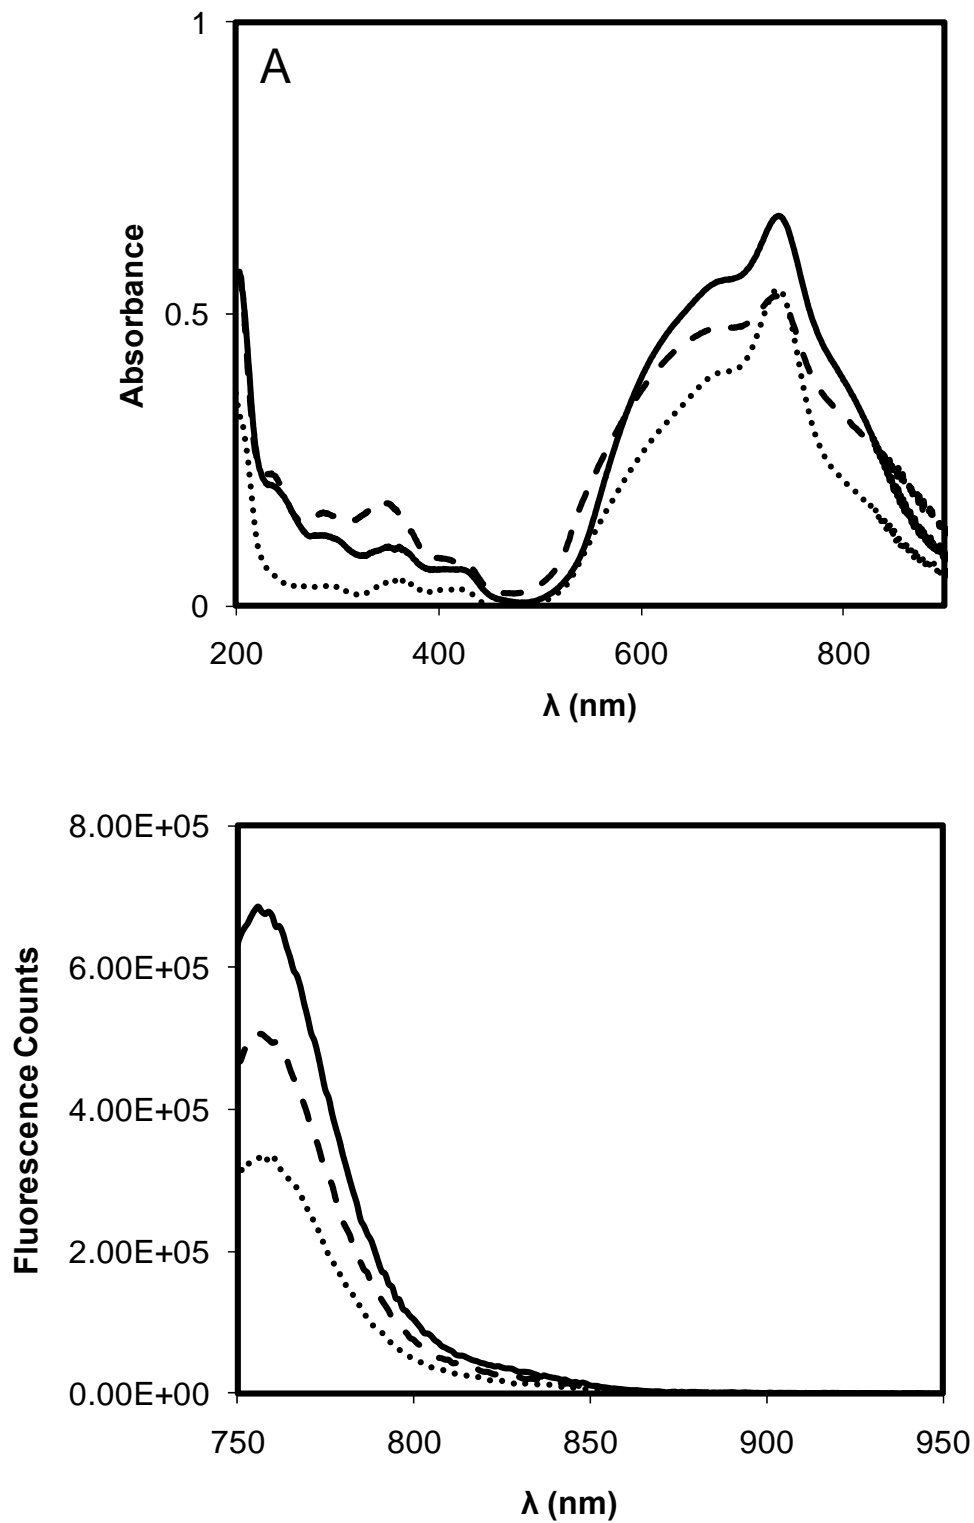

**Figure S2.** UV-Vis-NIR absorption spectra (A) and fluorescence emission spectra (B) of HMT nanoGUMBOS suspension in water. Excitation wavelength at 743 nm. Solid line [HMT][AOT], dashed line [HMT][NTf<sub>2</sub>], and dotted line [HMT][3, 5-CF<sub>3</sub>PheB].



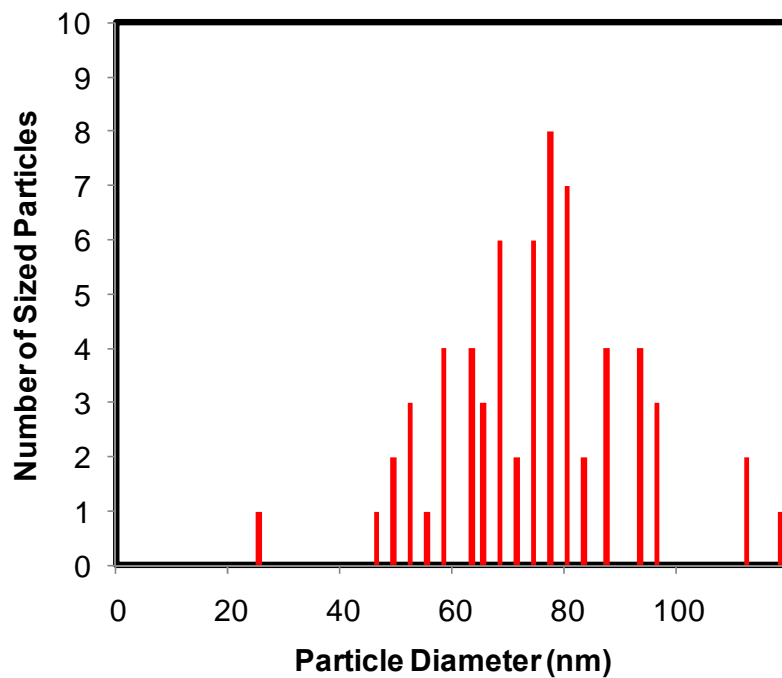

**Figure S3.** Histogram of size of [HMT][AOT] nanoGUMBOS obtained from TEM image shown in Figure 2A. The particles had an average particle diameter of  $71 \pm 16$  nm.

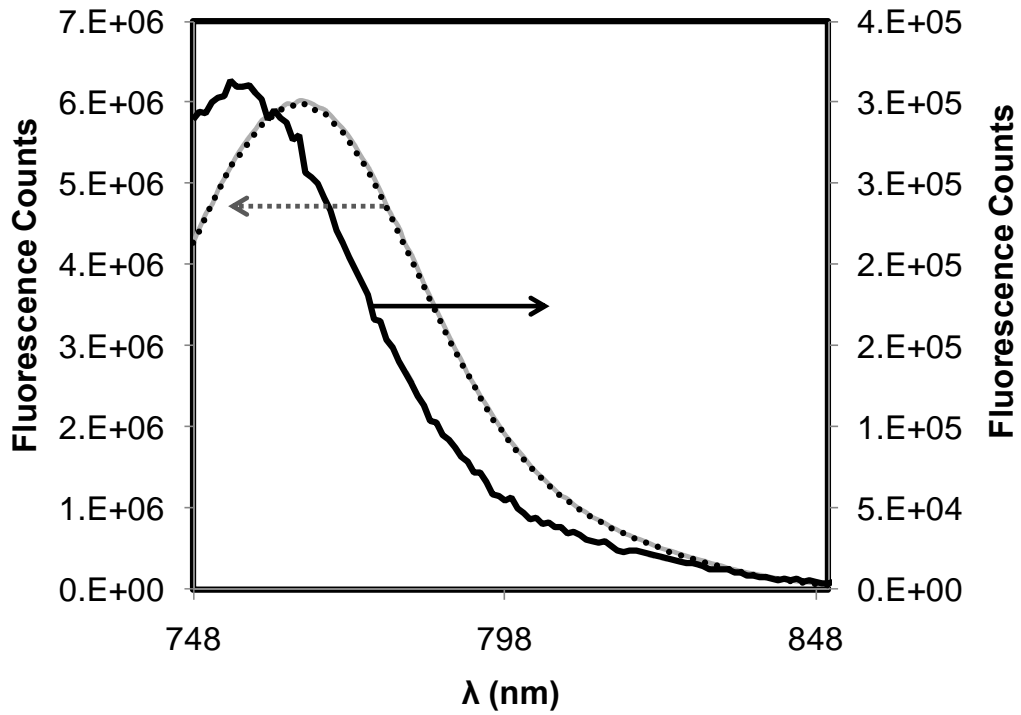

**Figure S4.** Fluorescence emission spectrum of equimolar mixture of [HMT][I] and [Na][AOT] in ethanol (solid gray line), [HMT][AOT] in ethanol (dotted line), and [HMT][AOT] nanoGUMBOS suspension in water (solid black line). The excitation wavelength is 743 nm for all three samples.
